# Supplementary material
Source: HighWire-hosted journal article supplement (http://www.ajnr.org/highwire/filestream/64223/field_highwire_adjunct_files/0/18-00590.pdf)
Supplement: 18-00590.pdf [file 18-00590.pdf]

**On-line Table: Literature review of MR imaging features in WSS**

| Reference                               | Clinical and Laboratory |          |                                                                     |                                                               | MRI Findings                                                 |
|-----------------------------------------|-------------------------|----------|---------------------------------------------------------------------|---------------------------------------------------------------|--------------------------------------------------------------|
|                                         | Sex                     | Age (Yr) | Neurologic                                                          | Endocrine                                                     |                                                              |
| Schneider and Bhatia, 2008 <sup>5</sup> | F                       | 22       | Mental retardation-dystonia                                         | Primary amenorrhea, alopecia, DM 2                            | Not available                                                |
|                                         | M                       | 36       | Dystonia (appendicular and axial)                                   | DM 2                                                          | Multiple parietal WM signal foci with some confluent lesions |
| Steindl et al, 2010 <sup>11</sup>       | M                       | 58       | Cognitive impairment, deafness, dystonia with pyramidal signs       | Hypogonadism, alopecia, DM 2                                  | Extensive homogeneous cerebral and cerebellar WM enhancement |
| Agopiantz et al, 2014 <sup>13</sup>     | F                       | 19       | Severe intellectual disability, dysarthria, and swallowing disorder | Primary amenorrhea, frontotemporal alopecia, low ILGF-1, DM 2 | Normal                                                       |
| Abdulla et al, 2015 <sup>6</sup>        | F                       | 17       | Moderate intellectual disability-dystonia-dysarthria                | Primary amenorrhea-frontotemporal alopecia-DM 2               | Normal                                                       |
|                                         | F                       | 40       | Sensorineural hearing loss, no extrapyramidal signs                 | Alopecia totalis, uterine hypoplasia, primary amenorrhea      | Periventricular and centrum semiovale bilateral WM changes   |
| Hdiji et al, 2016 <sup>9</sup>          | F                       | 34       | Sensorineural hearing loss, no extrapyramidal signs                 | Alopecia totalis and diabetes                                 | Periventricular and centrum semiovale bilateral WM changes   |
|                                         | M                       | 32       | Sensorineural hearing loss, no extrapyramidal signs                 | Alopecia totalis and diabetes                                 | Not available                                                |
|                                         | F                       | 25       | Generalized dystonia-mild mental retardation                        | Hypogonadotropic hypogonadism and uterine hypoplasia          | T2 hypointensities of the globus pallidi without WM changes  |

**Note:**—DM indicates diabetes mellitus; ILGF-1, insulin-like growth factor-1.
